# Supplementary material for: Safety and Reproducibility of a Clinical Trial System Using Induced Blood Stage Plasmodium vivax Infection and Its Potential as a Model to Evaluate Malaria Transmission
Source: PubMed Central journal article supplement (PMC5145139; doi:10.1371/journal.pntd.0005139), 2016-12-08

**S2 Supporting Material. Micrograph images of oocysts and other ovoid structures present in mosquito midguts.** (A) Micrograph images of 32 mosquito midguts infected with *P. vivax*. Oocysts are indicated with arrows. (B) Representative micrograph images of other ovoid structures observed on mosquito midguts fed with *P. vivax* infected blood (panels 1-16) and non-infected blood (panels 17-24, control mosquitoes). Ovoid structures are indicated with arrows.

(A) Micrograph images of 32 mosquito midguts infected with *P. vivax*

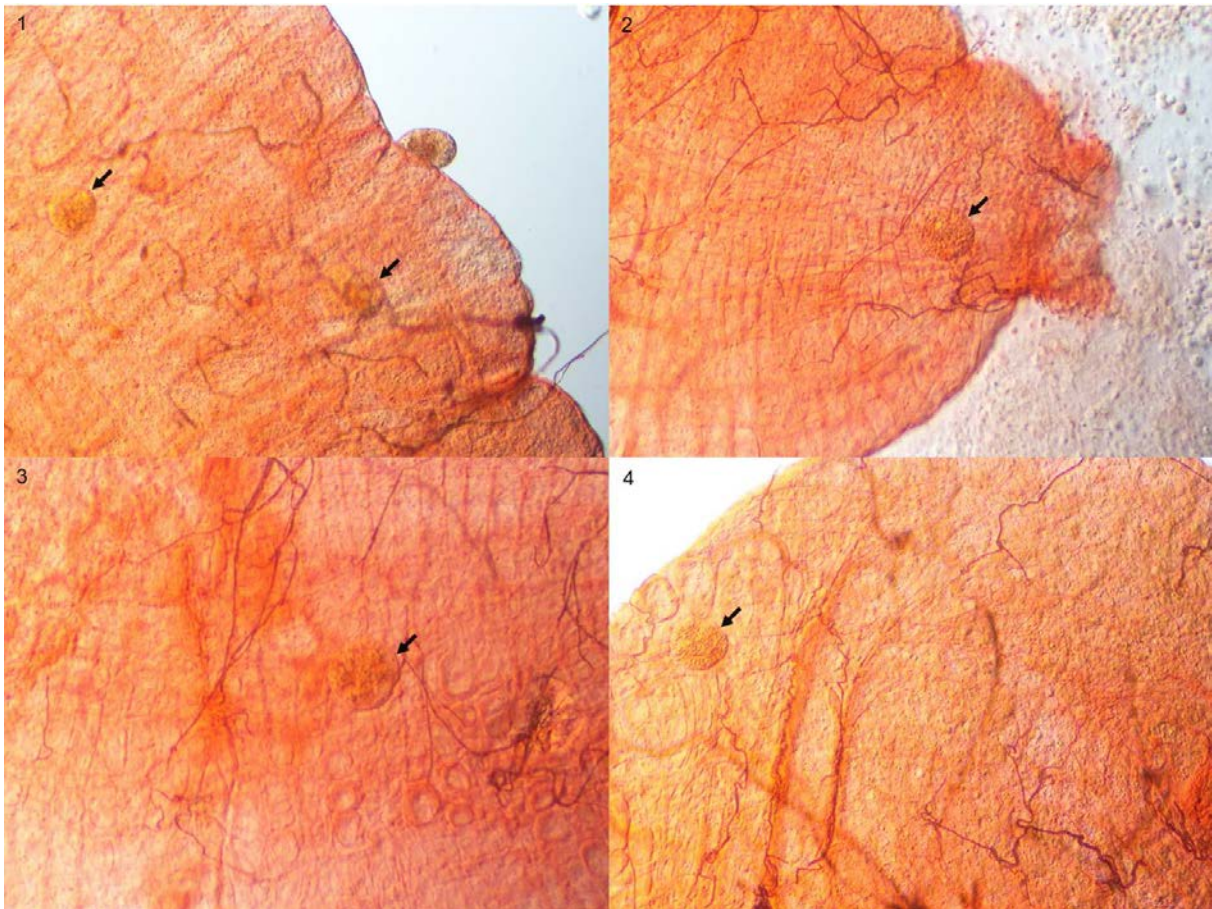

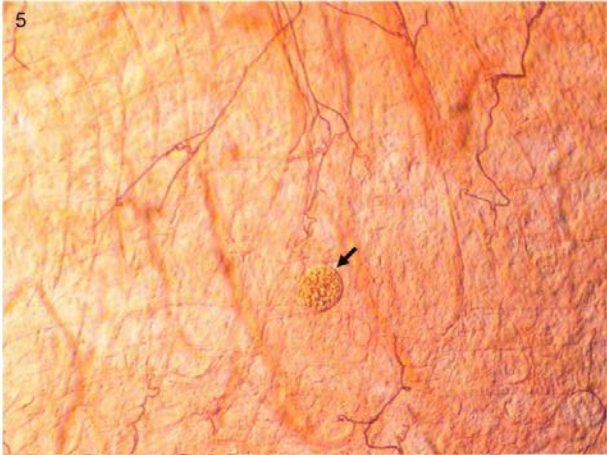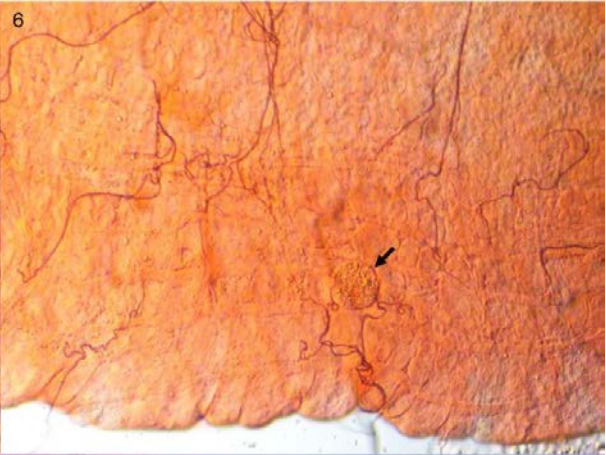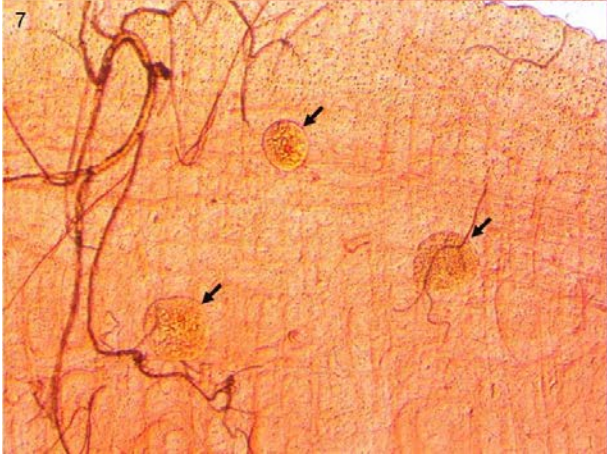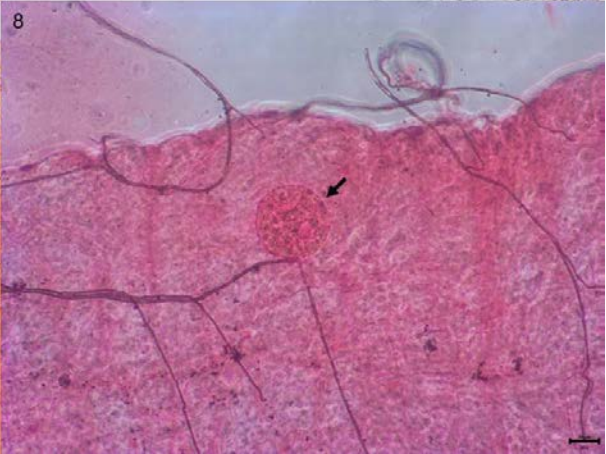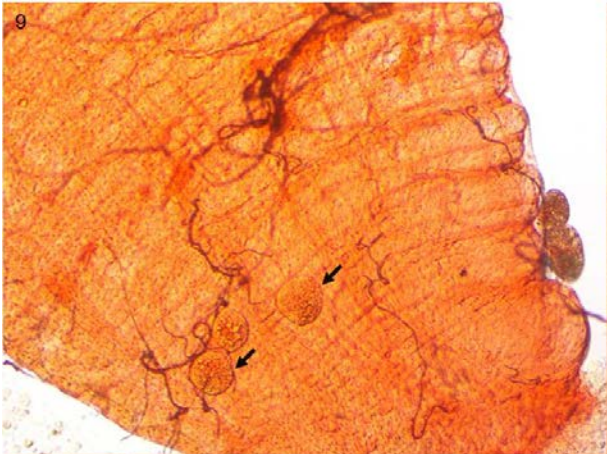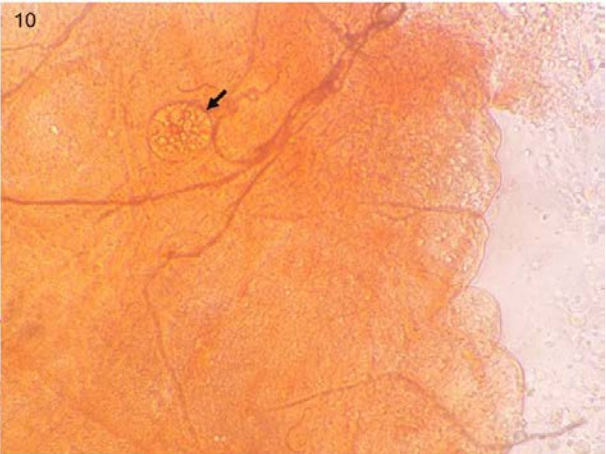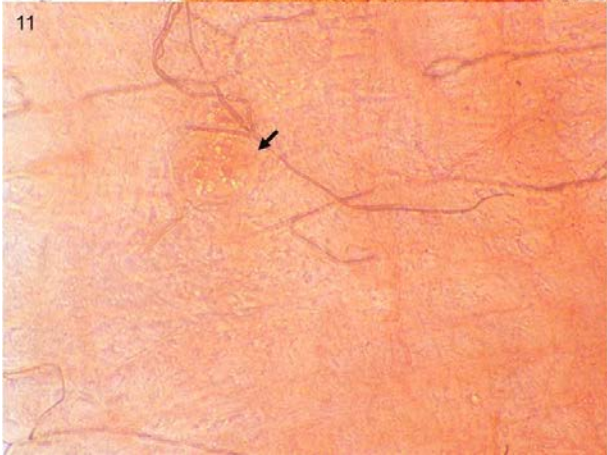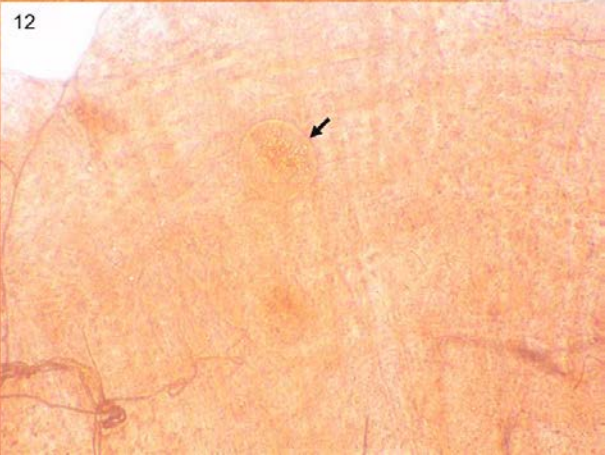

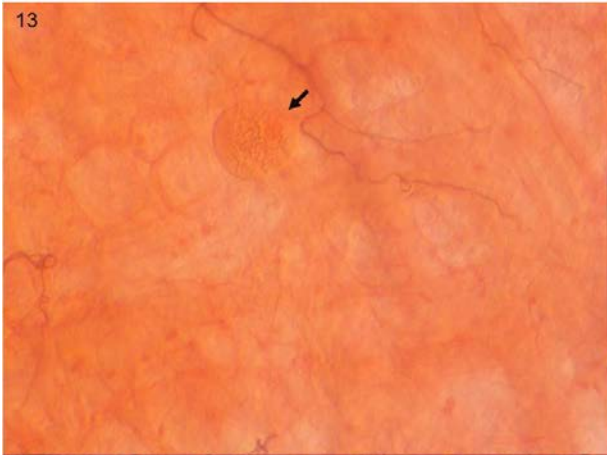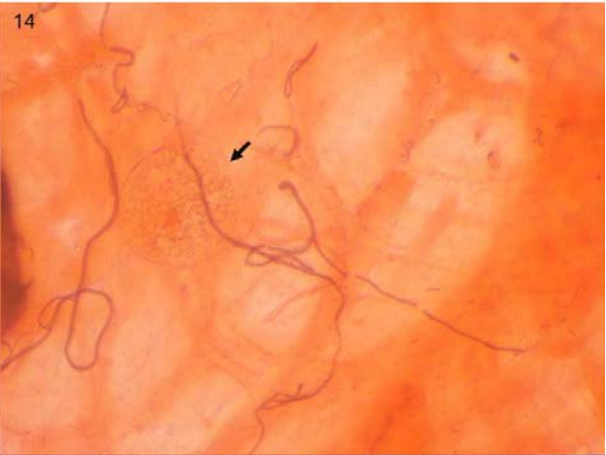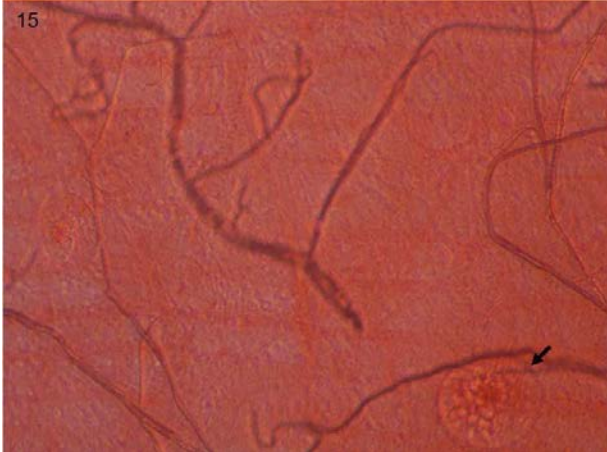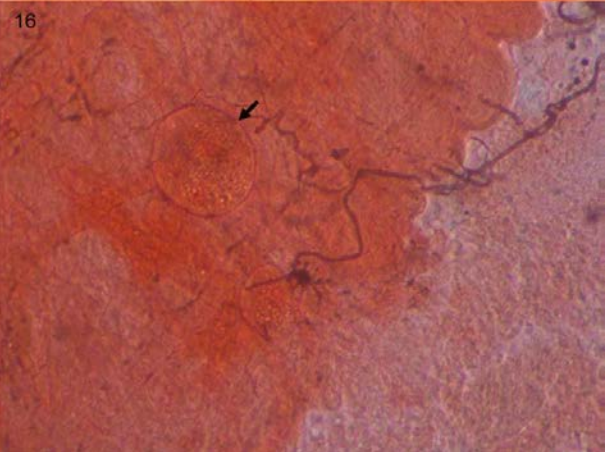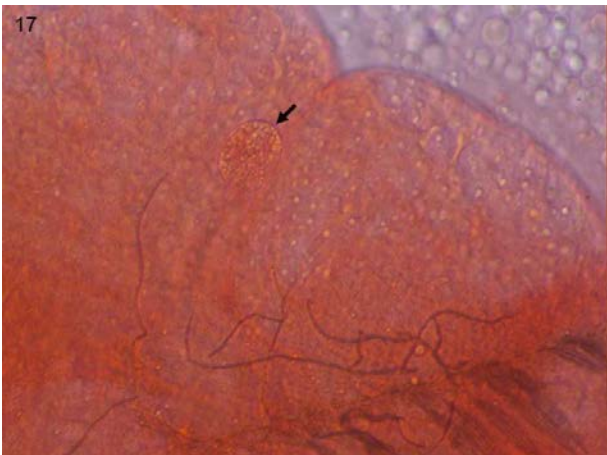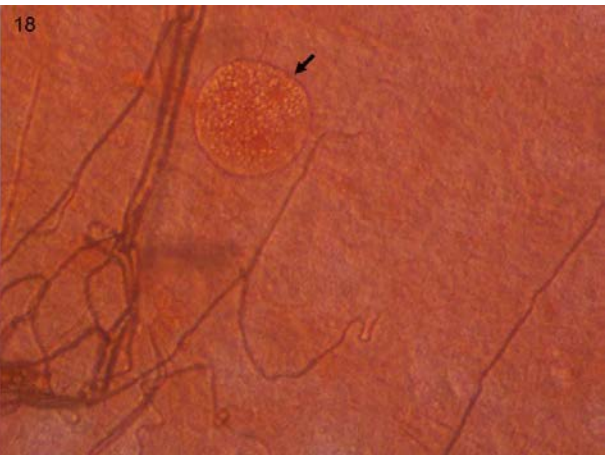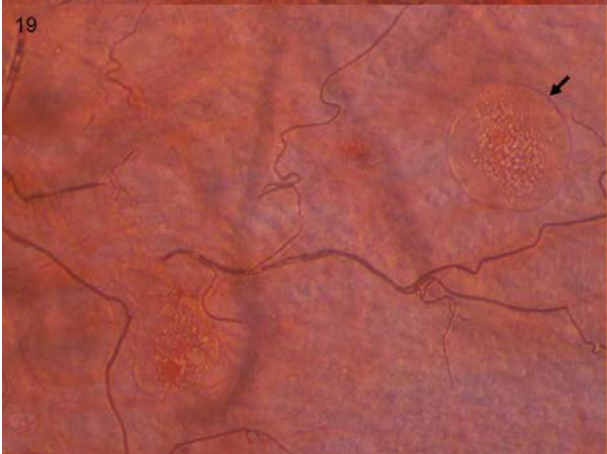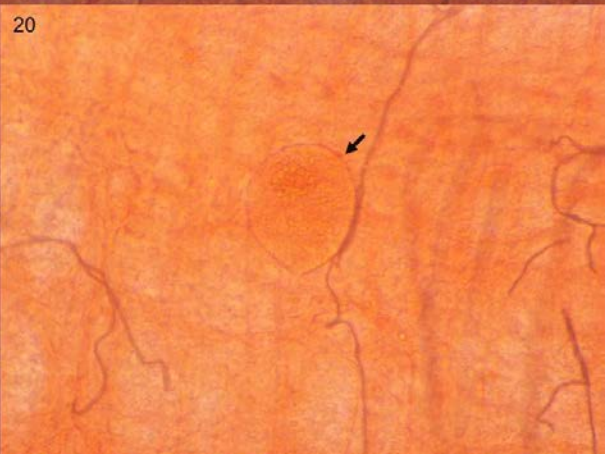

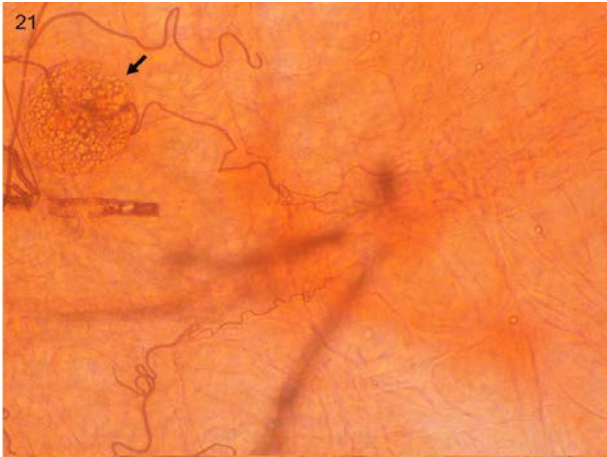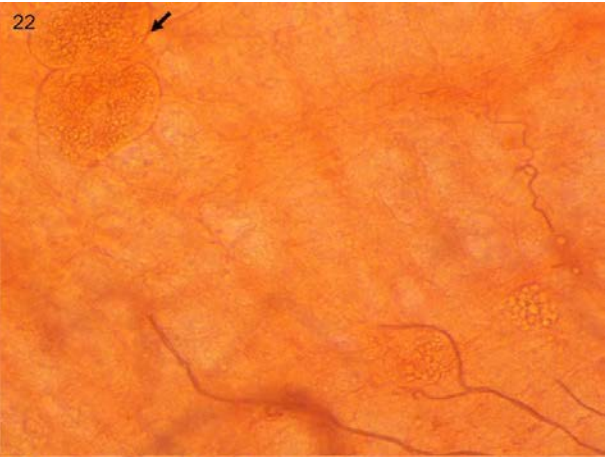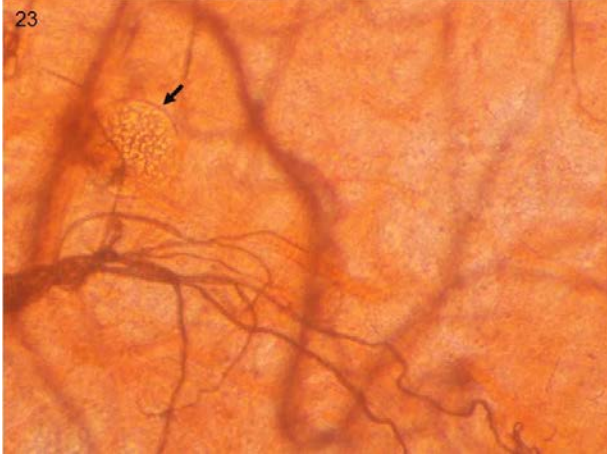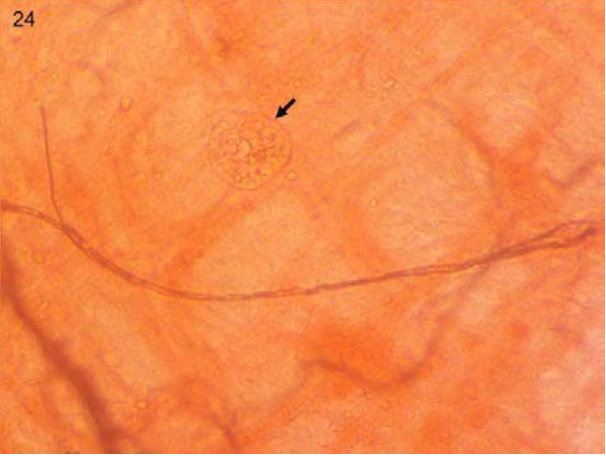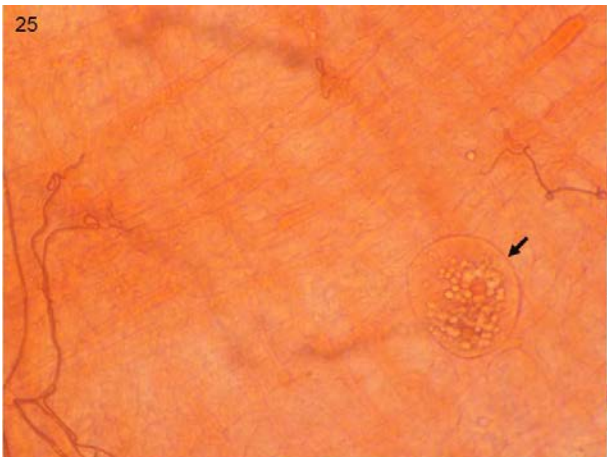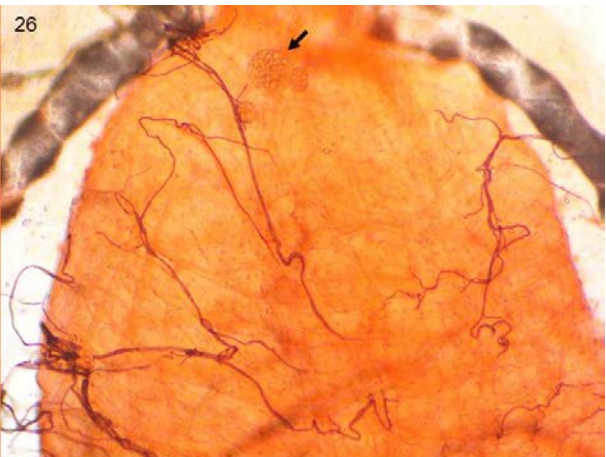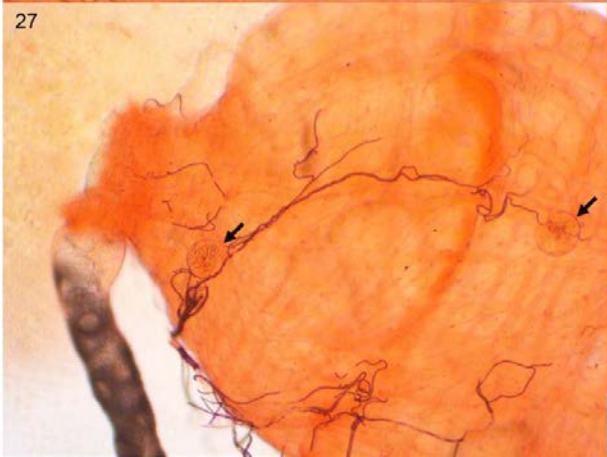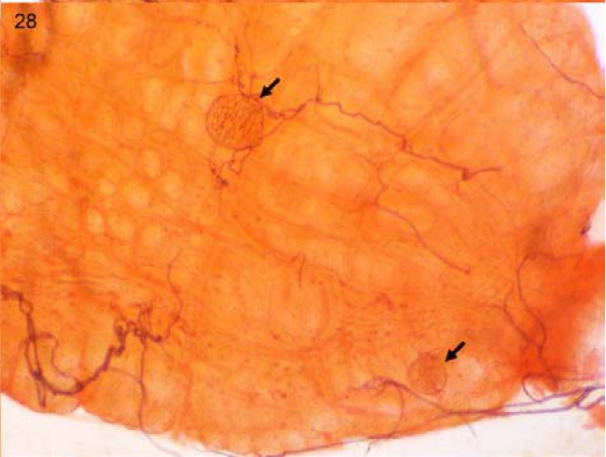

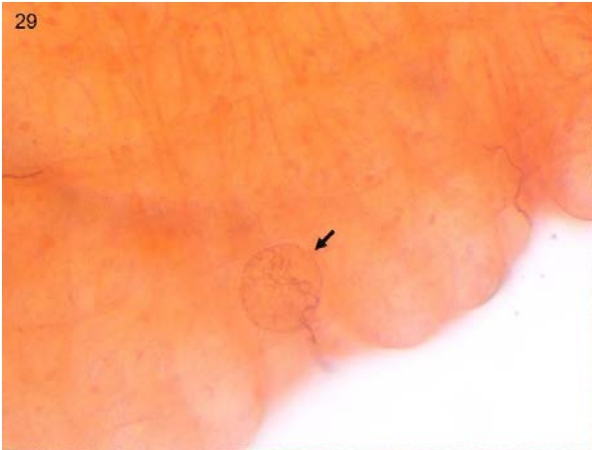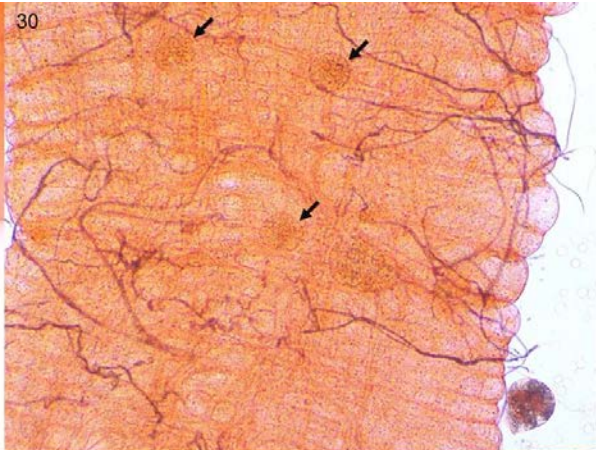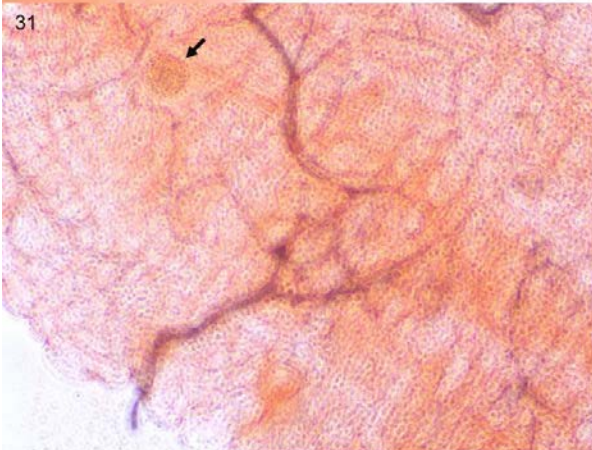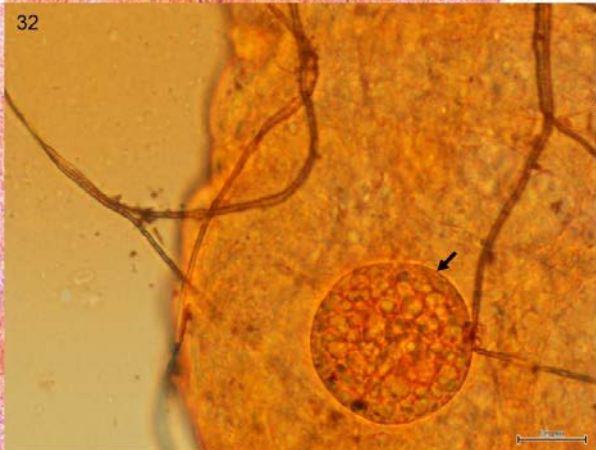

**(B)** Representative micrograph images of other ovoid structures observed on mosquito midguts fed with *P. vivax* infected blood (panels 1-16) and non-infected blood (panels 17-24, control mosquitoes)

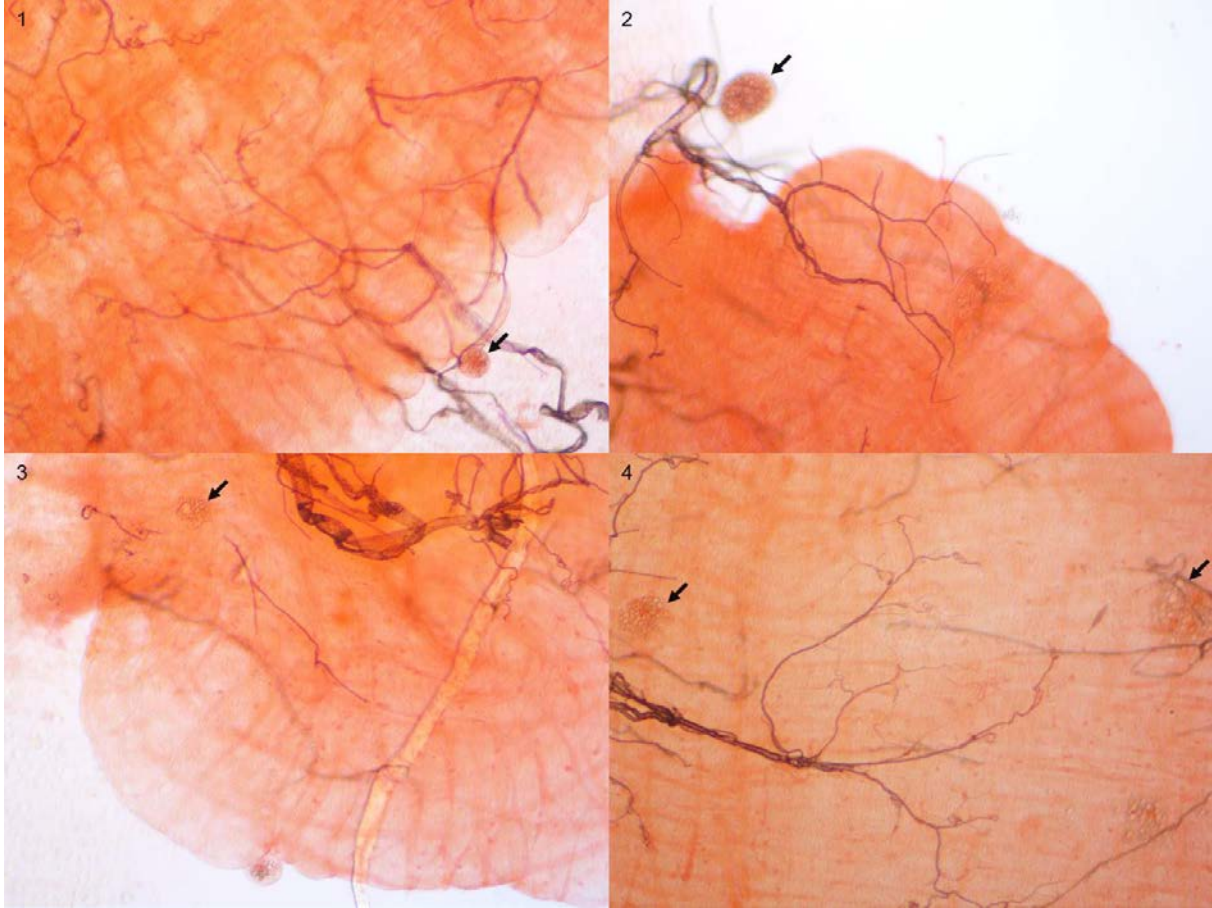

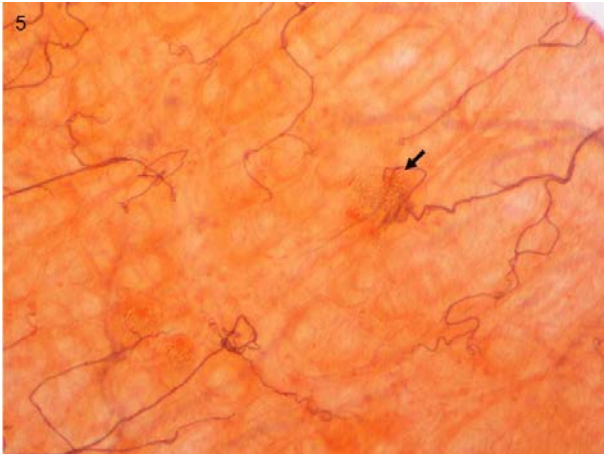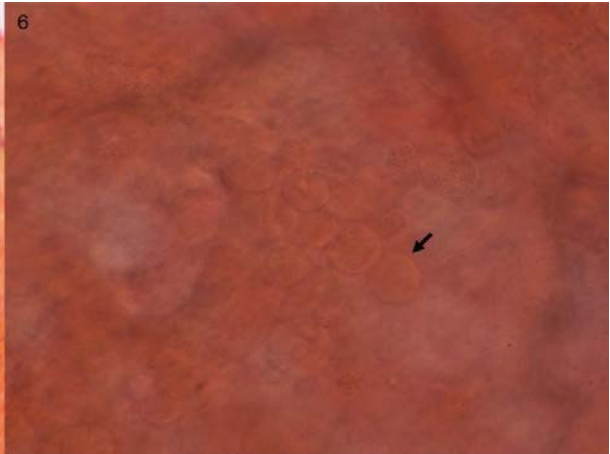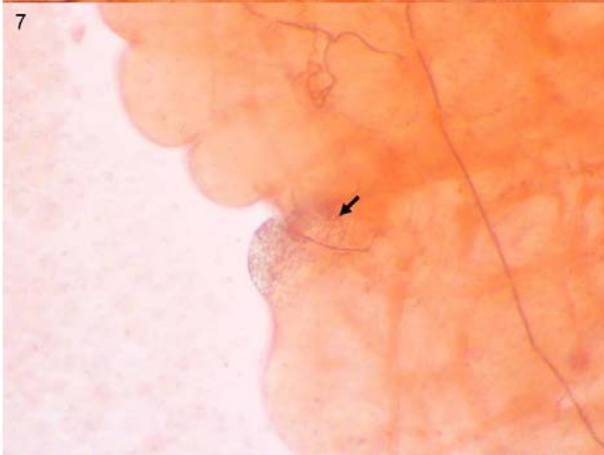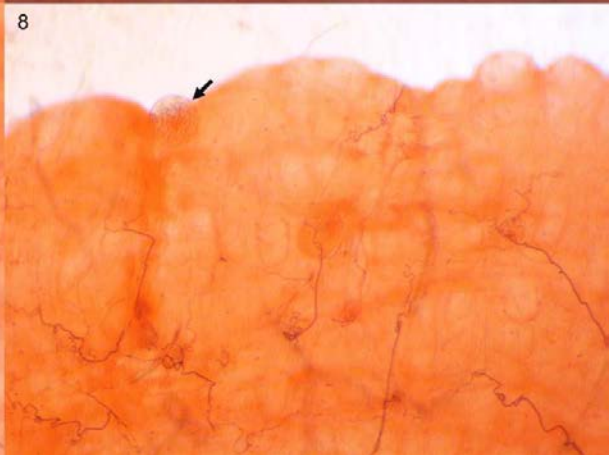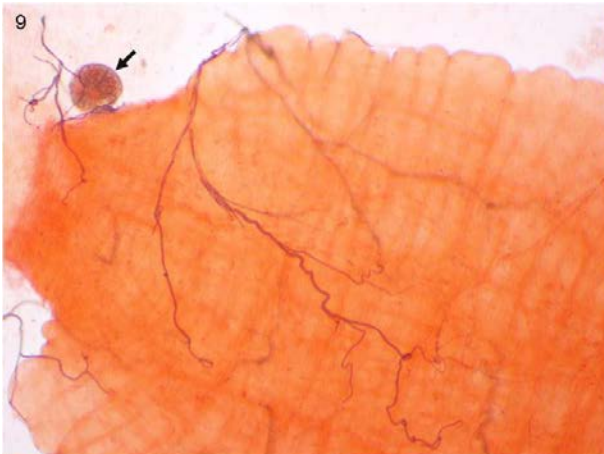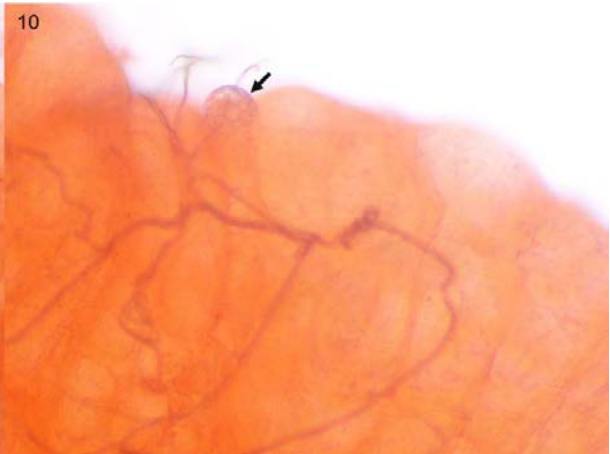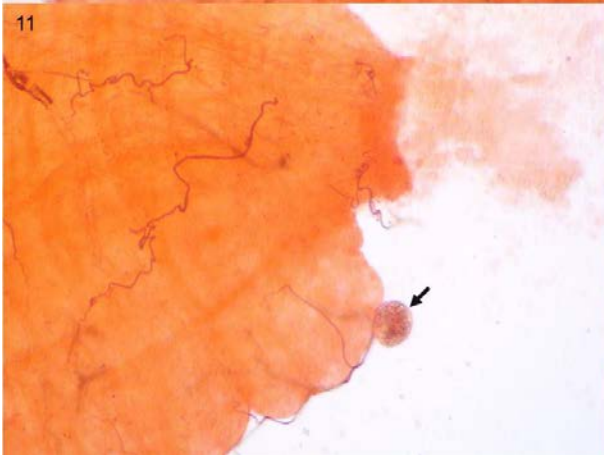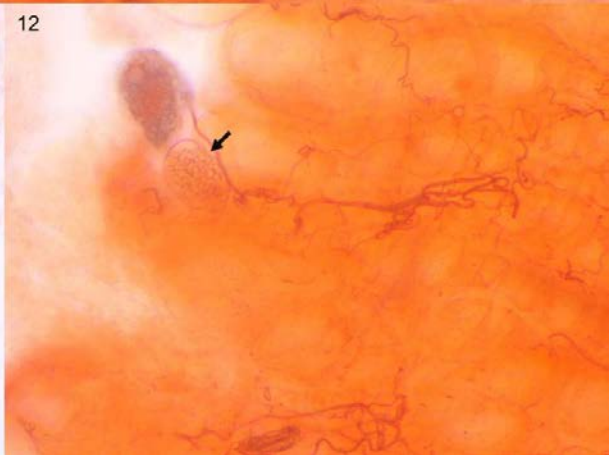

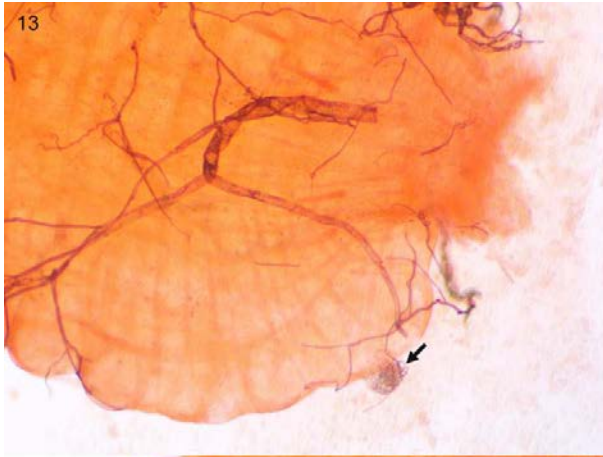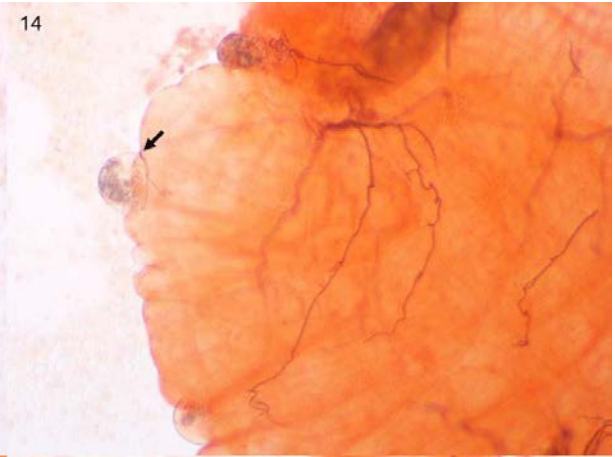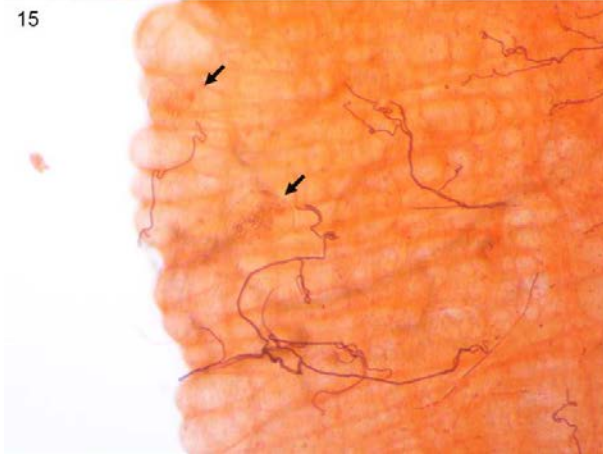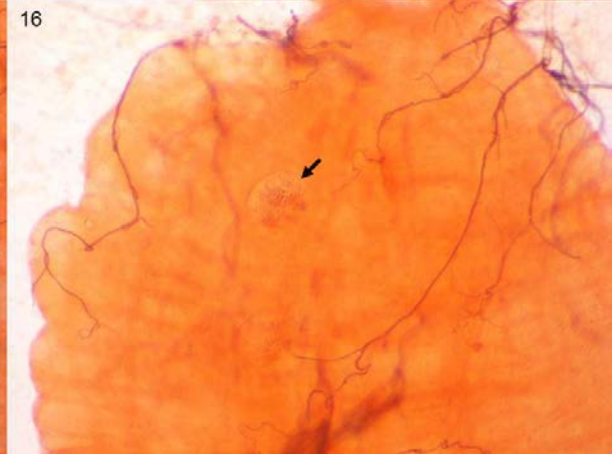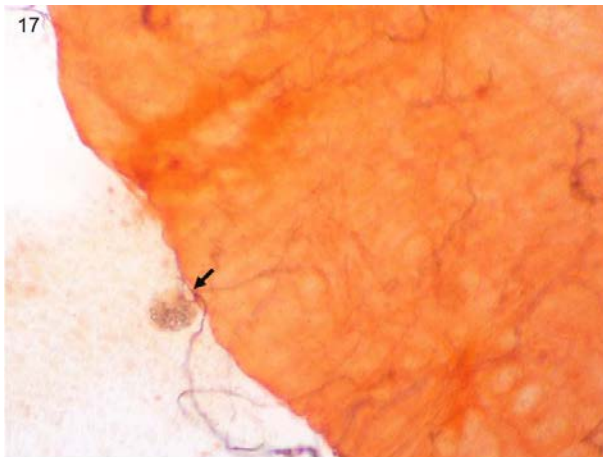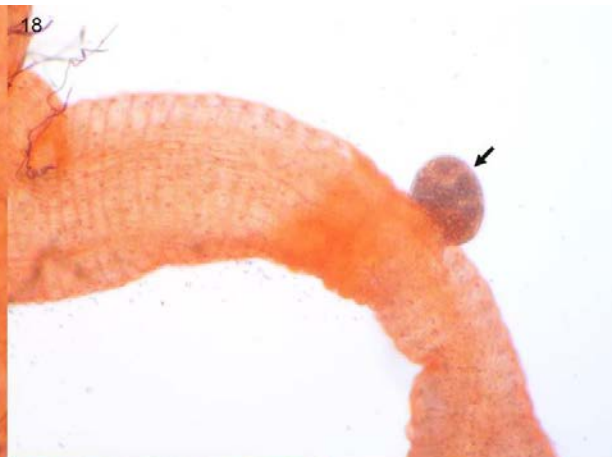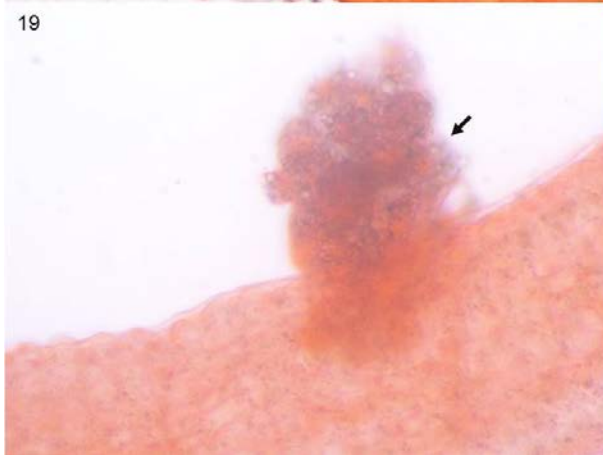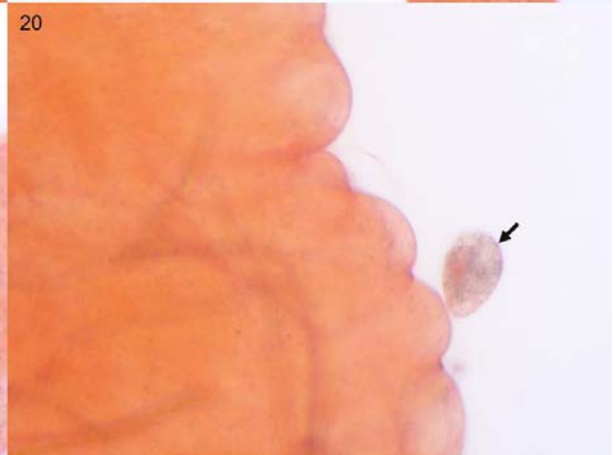



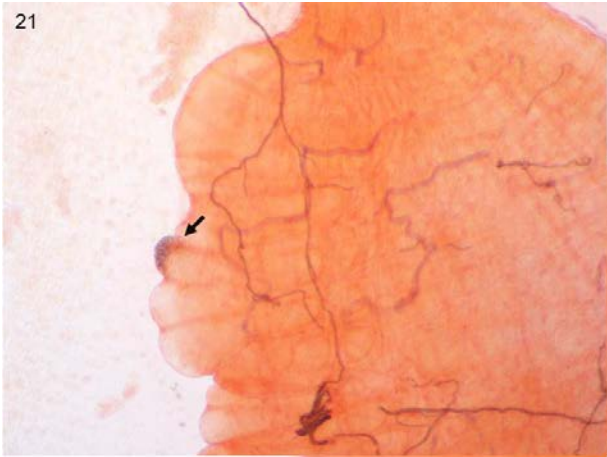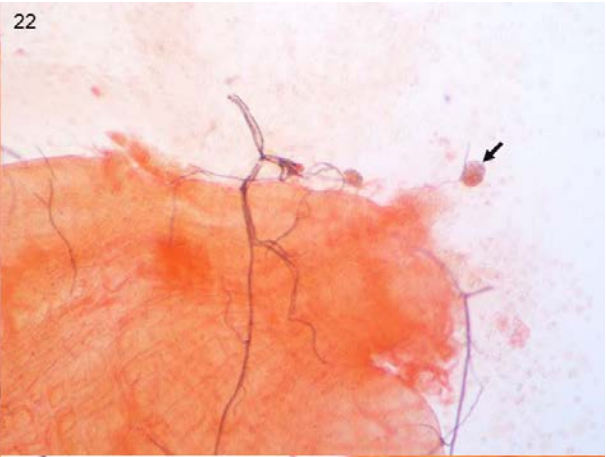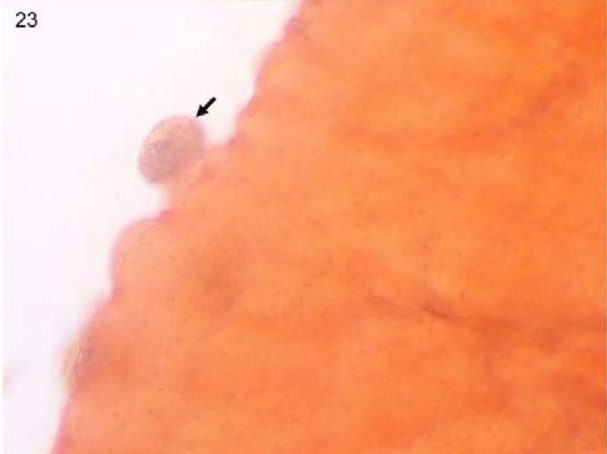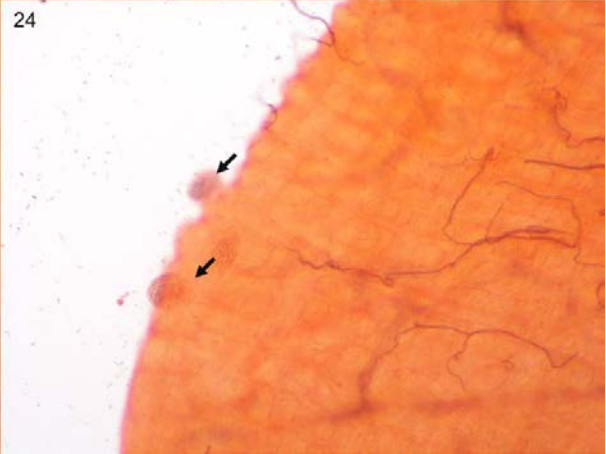

Supplement: pntd.0005139.s007.pdf [file pntd.0005139.s007.pdf]
