# Supplementary material for: Safety and Reproducibility of a Clinical Trial System Using Induced Blood Stage Plasmodium vivax Infection and Its Potential as a Model to Evaluate Malaria Transmission
Source: PubMed Central journal article supplement (PMC5145139; doi:10.1371/journal.pntd.0005139), 2016-12-08
Supplement: pntd.0005139.s005.pdf [file pntd.0005139.s005.pdf]

**S3 Table. Paracetamol doses by subject and study day**

| <b>Subject</b> | <b>Study day</b> | <b>Paracetamol doses<br/>(1 g/dose)</b> | <b>Total paracetamol doses<br/>taken during study</b> |
|----------------|------------------|-----------------------------------------|-------------------------------------------------------|
| <b>R001</b>    | 13               | 2                                       | <b>8</b>                                              |
|                | 14               | 3                                       |                                                       |
|                | 15               | 3                                       |                                                       |
| <b>R002</b>    | 12               | 1                                       | <b>10</b>                                             |
|                | 13               | 4                                       |                                                       |
|                | 14               | 4                                       |                                                       |
|                | 15               | 1                                       |                                                       |
| <b>R003</b>    | 12               | 1                                       | <b>15</b>                                             |
|                | 13               | 4                                       |                                                       |
|                | 14               | 4                                       |                                                       |
|                | 15               | 2                                       |                                                       |
|                | 16               | 3                                       |                                                       |
|                | 20               | 1                                       |                                                       |
| <b>R004</b>    | 14               | 1                                       | <b>2</b>                                              |
|                | 15               | 1                                       |                                                       |
| <b>R005</b>    | 13               | 1                                       | <b>5</b>                                              |
|                | 14               | 2                                       |                                                       |
|                | 15               | 2                                       |                                                       |
| <b>R006</b>    | 13               | 1                                       | <b>5</b>                                              |
|                | 14               | 3                                       |                                                       |
|                | 15               | 1                                       |                                                       |
