# Supplementary material for: Safety and Reproducibility of a Clinical Trial System Using Induced Blood Stage Plasmodium vivax Infection and Its Potential as a Model to Evaluate Malaria Transmission
Source: PubMed Central journal article supplement (PMC5145139; doi:10.1371/journal.pntd.0005139), 2016-12-08

**S3 Supporting Material. Periodic Acid Schiff (PAS) and Gram chromotrope stained sections of non-*Plasmodium* infected *Anopheles stephensi*.** (A) PAS stained section through whole *A. stephensi*. Scale bar = 500  $\mu$ M. (B) PAS stained section through midgut. Scale bar = 50  $\mu$ M. (C) and (D) Gram Chromotrope stained sections through *A. stephensi* midguts. Scare bar = 50  $\mu$ M. Arrows show ovoid structures with consistent staining to midgut tissue. h, head. t, thorax. a, abdomen. m, midgut.

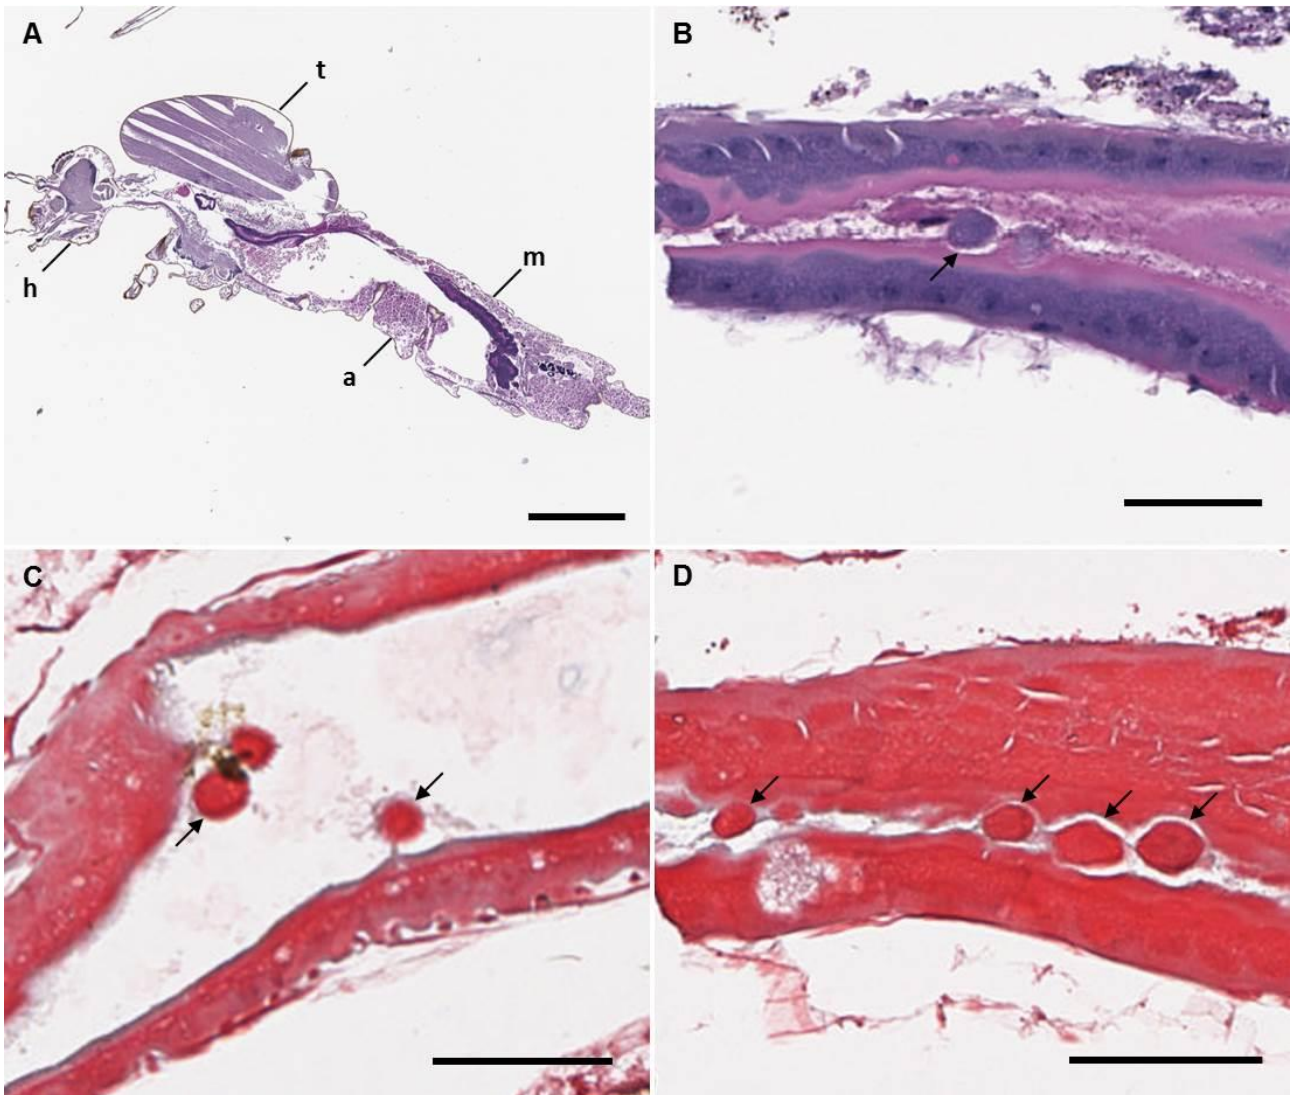

Supplement: pntd.0005139.s008.pdf [file pntd.0005139.s008.pdf]
